# Supplementary material for: Prediction of Methotrexate Clinical Response in Portuguese Rheumatoid Arthritis Patients: Implication ofMTHFRrs1801133 andATICrs4673993 Polymorphisms
Source: Hindawi journal article supplement (doi:10.1155/2014/368681), 2014-01-01
Supplement: f1 [file 368681.f1.pdf]

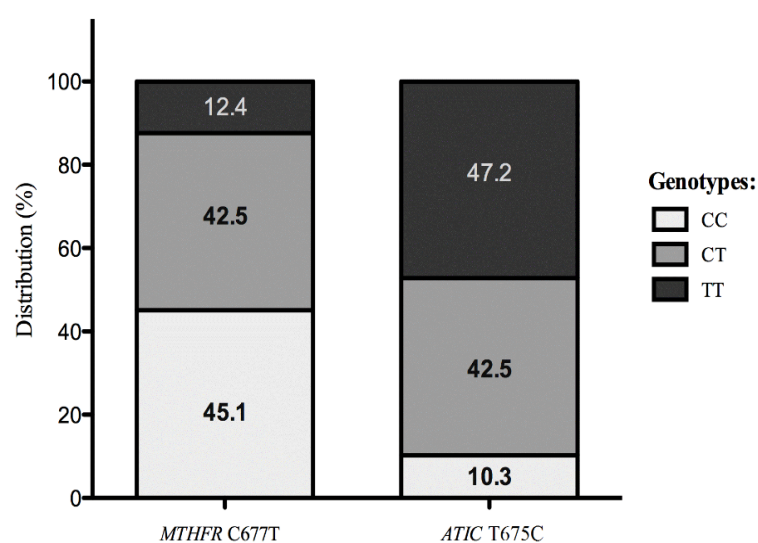

**Figure S1. Genotype distribution for *MTHFR* C677T and *ATIC* T675C polymorphisms.**

ATIC: 5-aminoimidazole-4-carboxamide ribonucleotide formyltransferase; C: cytosine; MTHFR: methylenetetrahydrofolate reductase; T: thymine.

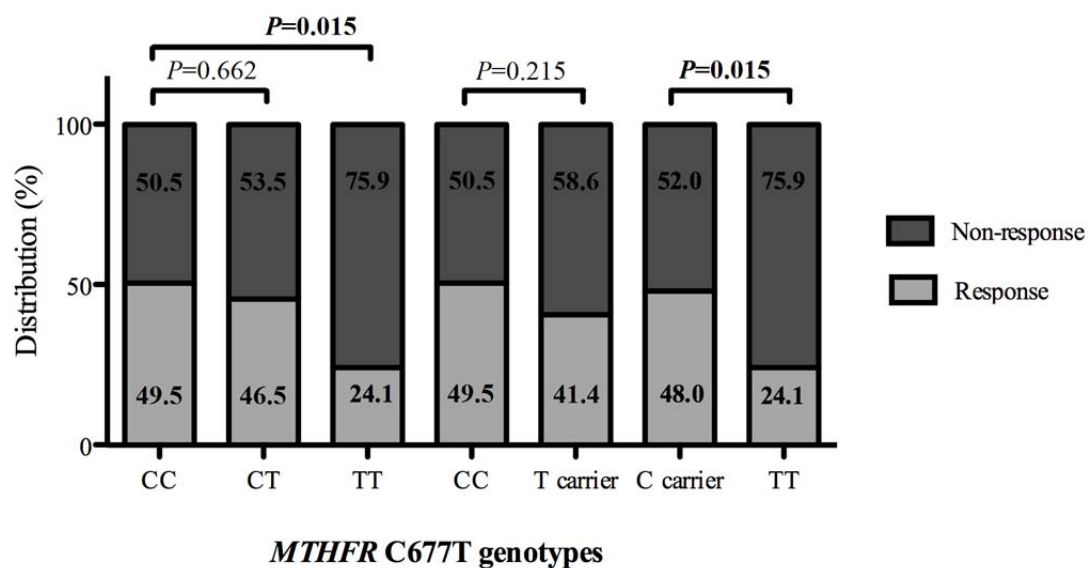

**Figure S2. Relation between *MTHFR* C677T genotypes and methotrexate clinical response.**

*P* value <0.05 is considered to be of statistical significance (highlighted in bold) when compared to reference genotype(s).

C: cytosine; MTHFR: methylenetetrahydrofolate reductase; T: thymine.

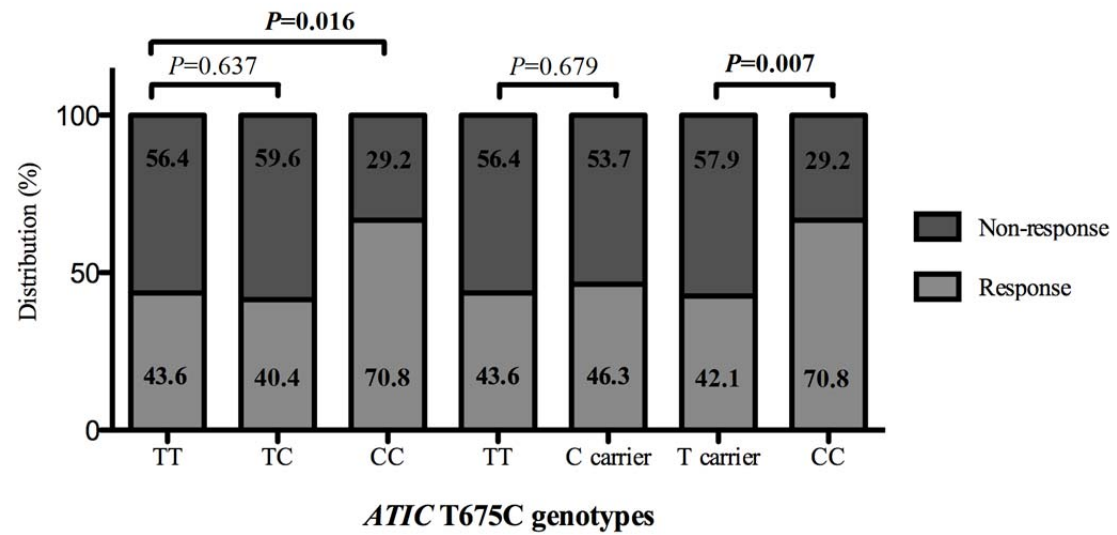

**Figure S3. Relation between *ATIC* T675C genotypes and methotrexate clinical response.**

*P* value <0.05 is considered to be of statistical significance (highlighted in bold) when compared to reference genotype(s).

*ATIC*: 5-aminoimidazole-4-carboxamide ribonucleotide formyltransferase; C: cytosine; T: thymine.
